# Supplementary material for: Common Variants of Homocysteine Metabolism Pathway Genes and Risk of Type 2 Diabetes and Related Traits in Indians
Source: Hindawi journal article supplement (doi:10.1155/2012/960318), 2011-09-25
Supplement: f1 [file 960318.f1.docx]

**Supplementary Table 1:** Genes and SNPs selected for the study and their allelic and genotypic distributions in type 2 diabetes patients and non-diabetic control subjects

| **Gene/SNP** | **Location** | | **Chromosomal Position** | **Alleles**  **(Major/ Minor)** | **MAF** | | **HWE (*P*-value)** | | **N**  **(Patients/**  **Controls)** | **Genotype count (11/12/22)** | |
| --- | --- | --- | --- | --- | --- | --- | --- | --- | --- | --- | --- |
| **Type 2 diabetes patients** | **Non-diabetic controls** | **Type 2 diabetes patients** | **Non-diabetic controls** | **Type 2 diabetes patients** | **Non-diabetic controls** |
| ***ACE,*** Angiotensin I converting enzyme (peptidyl-dipeptidase A) 1 (Chr 17) | | | | | | | | | | | |
| rs4291 | 5′ flank | | 58907926 | A/T | 0.39 | 0.37 | 0.2063 | 0.1731 | 1000/994 | 160/456/384 | 125/484/385 |
| rs4298 | Exon 4 | | 58910932 | C/T | 0.04 | 0.04 | – | 0.3997 | 1015/1001 | 01/81/933 | 00/80/921 |
| rs4309 | Exon 8 | | 58913655 | C/T | Assay failed | | | | | | |
| rs4331 | Exon 14 | | 58917784 | C/T | 0.41 | 0.41 | 0.0795 | 0.6485 | 1014/1006 | 183/463/368 | 165/494/347 |
| rs13306091 | Exon 17 | | 58920067 | C/T | NP | NP | – | – | 1015/1004 | NP | NP |
| rs4362 | Exon 23 | | 58927493 | C/T | 0.37 | 0.36 | 0.787 | 0.9455 | 1006/995 | 141/465/400 | 131/462/402 |
| rs4364 | Exon 25 | | 58928394 | A/C | NP | NP | – | – | 1011/1005 | NP | NP |
| ***AHCY***, Adenosylhomocysteinase (Chr 20) | | | | | | | | | | | |
| rs819146 | 5′ flank | | 32354861 | A/C | 0.22 | 0.21 | 0.09467 | 0.6367 | 1016/1000 | 56/325/635 | 47/329/624 |
| rs819147 | Intron 1 | | 32353365 | T/C | 0.22 | 0.21 | 0.1147 | 0.7759 | 1019/1005 | 56/327/636 | 46/331/628 |
| rs864702 | Intron 9 | | 32335211 | C/T | 0.22 | 0.21 | 0.114 | 0.705 | 1018/1006 | 56/326/636 | 47/331/628 |
| rs819173 | 3′ flank | | 32330223 | T/C | 0.22 | 0.21 | 0.114 | 0.705 | 1018/1006 | 56/326/636 | 47/331/628 |
| ***AMD1***, Adenosylmethionine decarboxylase 1 (Chr 6) | | | | | | | | | | | |
| rs2796749 | 5′ flank | | 111301396 | C/G | 0.33 | 0.31 | 0.5691 | 0.6086 | 1018/1006 | 113/440/465 | 102/426/478 |
| rs1007274 | Intron 1 | | 111307448 | G/A | 0.26 | 0.25 | 0.8077 | 0.07526 | 1018/1005 | 71/390/557 | 72/353/580 |
| rs7768897 | Intron 1 | | 111318976 | C/T | 0.25 | 0.25 | 0.8027 | 0.3979 | 1019/1006 | 66/380/573 | 67/365/574 |
| ***BHMT***, Betaine--homocysteine S-methyltransferase (Chr 5) | | | | | | | | | | | |
| rs16876512 | 5′ flank | | 78443017 | C/T | 0.05 | 0.04 | 0.7631 | – | 1019/1006 | 02/107/910 | 01/82/923 |
| rs492842 | Intron 1 | | 78445743 | T/C | 0.44 | 0.43 | 0.4442 | 0.3019 | 1018/1005 | 199/488/331 | 190/475/340 |
| rs3733890 | Exon 6 | | 78457715 | C/T | 0.29 | 0.28 | 0.6337 | 0.9368 | 951/989 | 81/382/488 | 75/398/516 |
| rs585800 | 3′ UTR | | 78462964 | A/T | 0.15 | 0.14 | 0.05769 | 0.6029 | 1017/1006 | 29/237/751 | 22/240/744 |
| ***CBS***, Cystathionine-beta-synthase (Chr 21) | | | | | | | | | | | |
| rs397589 | Intron 3 | | 44490214 | G/T | Assay failed | | | | | | |
| rs234706 | Exon 8 | | 44485350 | A/G | Assay failed | | | | | | |
| rs2014564 | Intron 11 | | 43354238 | G/A | 0.44 | 0.46 | 0.2247 | 0.8992 | 1011/1006 | 184/518/309 | 214/498/294 |
| rs6586282 | Intron 14 | | 43351566 | G/A | 0.10 | 0.10 | 0.109 | 0.4919 | 1015/1005 | 05/189/821 | 08/189/808 |
| rs706208 | 3′ UTR | | 43346515 | T/C | 0.41 | 0.39 | 0.5613 | 0.2349 | 1018/1005 | 169/503/346 | 165/462/378 |
| ***CHDH***, Choline dehydrogenase (Chr 3) | | | | | | | | | | | |
| rs6445607 | Intron 1 | | 53852189 | T/G | 0.25 | 0.25 | 0.1288 | 0.2015 | 1013/995 | 71/359/583 | 68/355/572 |
| rs12676 | Exon 3 | | 53832843 | G/T | 0.18 | 0.18 | 0.1511 | 0.1259 | 956/978 | 37/267/652 | 38/272/668 |
| rs2241808 | Exon 5 | | 53831693 | A/G | 0.40 | 0.41 | 0.4323 | 0.6016 | 1018/1004 | 153/499/366 | 171/477/356 |
| rs4563403 | 3′ flank | | 53825854 | G/A | 0.10 | 0.11 | 0.7265 | 0.624 | 1019/1006 | 11/181/827 | 13/191/802 |
| ***CTH***, Cystathionase (Chr 1) | | | | | | | | | | | |
| rs663465 | 5′ flank | | 70649346 | C/T | 0.46 | 0.46 | 0.05069 | 0.611 | 1019/1004 | 229/475/315 | 213/490/301 |
| rs672203 | Intron 3 | | 70659687 | T/C | 0.30 | 0.31 | 1.06×10-08 | 2.91×10-10 | 1000/978 | 131/345/524 | 134/330/514 |
| rs663649 | Intron 7 | | 70669771 | C/A | 0.20 | 0.21 | 0.1761 | 0.1531 | 1019/1006 | 49/316/654 | 52/318/636 |
| rs1021737 | Exon 12 | | 70677388 | G/T | 0.26 | 0.25 | 0.2876 | 0.01349 | 1018/1006 | 61/404/553 | 46/402/558 |
| rs6693082 | 3′ flank | | 70678262 | T/G | 0.26 | 0.25 | 0.1954 | 0.01782 | 1008/994 | 62/408/538 | 48/401/545 |
| ***FOLH1***, Folate hydrolase (Chr 11) | | | | | | | | | | | |
| rs202676 | | Exon 2 | 49227620 | C/T | Assay failed | | | | | | |
| rs182169 | | Exon 6 | 49207315 | C/T | Assay failed | | | | | | |
| rs202719 | | Intron 11 | 49149266 | T/C | 0.13 | 0.12 | 0.204 | 0.2902 | 1016/1002 | 21/217/778 | 18/203/781 |
| rs2299650 | | Intron 17 | 49174007 | G/T | Assay failed | | | | | | |
| rs6485965 | | 3′ flank | 49166730 | A/G | Assay failed | | | | | | |
| ***MAT1A***, Methionine adenosyltransferase I, alpha (Chr 10) | | | | | | | | | | | |
| rs17677908 | 5′ flank | | 82039583 | T/C | 0.27 | 0.27 | 0.7478 | 0.4725 | 1015/1006 | 74/392/549 | 78/388/540 |
| rs2282367 | Intron 4 | | 82030326 | G/A | 0.16 | 0.15 | 0.4806 | 0.8029 | 1019/1005 | 22/279/718 | 23/252/730 |
| rs10788546 | Exon 7 | | 82024834 | C/T | 0.17 | 0.16 | 0.3077 | 0.8144 | 1016/1005 | 23/290/703 | 27/268/710 |
| rs2993763 | Exon 9 | | 82023574 | A/G | 0.34 | 0.36 | – | 0.9452 | 1019/1006 | 117/457/445 | 128/460/418 |
| rs1985908 | 3′ UTR | | 82022220 | T/C | 0.45 | 0.46 | 0.04277 | 0.3407 | 1016/1006 | 221/471/324 | 218/484/304 |
| ***MTHFD1***, Methylenetetrahydrofolate dehydrogenase (NADP+ dependent) 1 (Chr 14) | | | | | | | | | | | |
| rs1076991 | 5′ flank | | 63924794 | A/G | 0.40 | 0.44 | 0.8441 | 0.6482 | 1005/969 | 165/480/360 | 181/484/304 |
| rs8006686 | Intron 2 | | 63938424 | T/C | 0.17 | 0.19 | 0.3637 | 0.6762 | 1017/1006 | 32/273/712 | 32/309/665 |
| rs1950902 | Exon 6 | | 63952133 | G/A | 0.07 | 0.06 | 0.31 | – | 1018/1005 | 02/132/884 | 04/121/880 |
| rs8016556 | Intron 16 | | 63973201 | A/G | 0.26 | 0.26 | – | 0.04817 | 1019/1006 | 69/394/556 | 79/361/566 |
| rs2236225 | Exon 21 | | 63978598 | T/C | 0.48 | 0.49 | 0.4121 | 0.4105 | 1005/1000 | 242/489/274 | 242/486/272 |
| rs2281603 | Intron 27 | | 63995850 | T/C | 0.21 | 0.21 | – | 0.1287 | 1019/1006 | 47/344/628 | 53/318/635 |
| ***MTHFD1L***, Methylenetetrahydrofolate dehydrogenase (NADP+ dependent) 1-like (Chr 6) | | | | | | | | | | | |
| rs9397028 | 5′ flank | | 151226920 | G/A | 0.41 | 0.41 | 0.02787 | 0.3552 | 963/982 | 145/500/318 | 156/489/337 |
| rs2073063 | Intron 4 | | 151240764 | A/G | 0.43 | 0.43 | 0.2237 | 0.3342 | 1019/1006 | 175/518/326 | 177/509/320 |
| rs1555179 | Intron 16 | | 151313049 | C/T | 0.26 | 0.23 | 0.2855 | 0.9283 | 1019/1004 | 60/402/557 | 52/351/601 |
| rs509474 | Exon 24 | | 151378432 | G/C | 0.32 | 0.32 | 0.3886 | 0.8291 | 1019/1006 | 111/432/476 | 103/443/460 |
| rs1047662 | 3′ UTR | | 151464528 | C/G | 0.27 | 0.27 | 0.936 | 0.2335 | 1019/1006 | 72/396/551 | 83/384/539 |
| ***MTHFR***, Methylenetetrahydrofolate reductase (Chr 1) | | | | | | | | | | | |
| rs3737965 | 5′ flank | | 11789038 | G/A | 0.10 | 0.10 | 2.65×10-05 | 0.000512 | 1010/1004 | 0/201/809 | 1/195/808 |
| rs9651118 | Intron 1 | | 11784801 | T/C | 0.26 | 0.26 | 0.2534 | 0.4568 | 1019/1006 | 61/406/552 | 70/374/562 |
| rs1801133 | Exon 4 | | 11778965 | C/T | 0.18 | 0.21 | 0.6 | – | 1018/1006 | 31/310/677 | 45/335/626 |
| rs1801131 | Exon 7 | | 11777063 | A/C | 0.42 | 0.40 | 0.9487 | 0.6924 | 1018/1006 | 178/497/343 | 154/488/364 |
| rs2274976 | Exon 11 | | 11850927 | A/G | Assay failed | | | | | | |
| ***MTR***, 5-methyltetrahydrofolate-homocysteine methyltransferase (Chr 1) | | | | | | | | | | | |
| rs16834388 | 5′ flank | | 236957123 | G/T | Assay failed | | | | | | |
| rs946403 | Intron 13 | | 235062740 | A/G | 0.40 | 0.40 | 0.1915 | 0.7419 | 1018/1006 | 152/509/357 | 155/487/364 |
| rs1770449 | Intron 24 | | 235104784 | A/G | 0.28 | 0.28 | 0.3524 | – | 1016/1005 | 74/423/519 | 79/408/518 |
| rs1805087 | Exon 26 | | 235115123 | T/C | 0.31 | 0.30 | 0.1858 | 0.2054 | 1019/1006 | 106/416/497 | 84/443/479 |
| rs16834521 | Exon 29 | | 235121192 | T/C | 0.34 | 0.33 | 0.7255 | 0.7191 | 1018/1000 | 112/460/446 | 108/434/458 |
| rs10737812 | Exon 31 | | 235125451 | T/C | 0.37 | 0.38 | 0.8405 | 0.6398 | 1018/1006 | 141/472/405 | 149/467/390 |
| rs1050993 | 3′ UTR | | 235128928 | C/T | 0.28 | 0.28 | 0.4386 | – | 1019/1006 | 75/422/522 | 80/407/519 |
| ***MTRR***, 5-methyltetrahydrofolate-homocysteine methyltransferase reductase (Chr 5) | | | | | | | | | | | |
| rs1801394 | Exon 2 | | 7923973 | G/A | 0.50 | 0.47 | 0.3163 | 0.5694 | 1018/1005 | 260/493/265 | 229/492/284 |
| rs1532268 | Exon 5 | | 7878179 | A/G | Assay failed | | | | | | |
| rs162036 | Exon 7 | | 7938959 | T/C | 0.15 | 0.14 | 0.5378 | 0.3722 | 1013/1006 | 25/253/735 | 17/255/734 |
| rs2287780 | Exon 9 | | 7942304 | C/T | 0.04 | 0.03 | 0.647 | 0.6214 | 1018/1006 | 02/72/944 | 00/66/940 |
| rs16879334 | Exon 10 | | 7944506 | G/C | 0.04 | 0.03 | 0.643 | 0.6214 | 1018/1006 | 02/71/945 | 00/66/940 |
| rs10380 | Exon 14 | | 7950191 | G/A | 0.14 | 0.14 | 0.4434 | 0.2812 | 1018/1006 | 24/244/750 | 14/245/747 |
| rs8659 | 3′ UTR | | 7900833 | A/T | Assay failed | | | | | | |
| ***NOS3***, Nitric oxide synthase 3 (endothelial cell) (Chr 7) | | | | | | | | | | | |
| rs2070744 | Intron 1 | | 150321012 | A/G | 0.20 | 0.21 | 0.2848 | 0.451 | 1018/1005 | 47/317/654 | 49/328/628 |
| rs1549758 | Exon 7 | | 150326659 | C/T | NP | NP | – | – | 1018/1004 | NP | NP |
| rs1799983 | Exon 8 | | 150327044 | G/T | 0.18 | 0.18 | 0.673 | 0.3262 | 1014/997 | 31/307/676 | 26/299/672 |
| rs2566514 | Exon 17 | | 150335183 | G/C | 0.33 | 0.35 | 0.4786 | – | 1014/1005 | 116/439/459 | 120/454/431 |
| ***SHMT1***, Serine hydroxymethyltransferase 1 (soluble) (Chr 17) | | | | | | | | | | | |
| rs2273028 | Intron 7 | | 18179737 | C/T | 0.18 | 0.19 | 0.9147 | 0.05266 | 1019/1006 | 33/297/689 | 47/292/667 |
| rs1979277 | Exon 12 | | 18172821 | G/A | 0.17 | 0.18 | 0.7339 | 0.08354 | 1018/1003 | 29/278/711 | 40/277/686 |
| rs12949119 | 3′ flank | | 18170177 | A/T | 0.40 | 0.40 | 0.9448 | 0.2512 | 913/948 | 142/439/332 | 145/474/329 |
| ***SLC19A1***, Solute carrier family 19 (folate transporter), member 1 (Chr 21) | | | | | | | | | | | |
| rs1051266 | Exon 2 | | 45782222 | G/A | 0.37 | 0.39 | 0.84 | 0.8941 | 1003/994 | 142/467/394 | 152/471/371 |
| rs12659 | Exon 3 | | 45775984 | G/A | 0.33 | 0.35 | 0.5198 | 0.8337 | 1006/998 | 112/434/460 | 121/448/429 |
| rs35786590 | Exon 6 | | 45760103 | C/T | NP | NP | – | – | 1009/991 | NP | NP |
| rs1051296 | 3′ UTR | | 45759289 | A/C | 0.45 | 0.46 | 0.6573 | 0.4462 | 1014/1006 | 212/495/307 | 219/487/300 |
| ***TCN2***, Transcobalamin II (Chr 22) | | | | | | | | | | | |
| rs5749131 | 5′ flank | | 29331822 | A/G | 0.39 | 0.41 | 0.4295 | 0.7439 | 1017/1006 | 162/472/383 | 169/480/357 |
| rs9606756 | Exon 2 | | 29336860 | T/C | 0.09 | 0.09 | 0.04229 | 0.2629 | 1018/1006 | 13/149/856 | 12/165/829 |
| rs1801198 | Exon 6 | | 29341610 | G/C | 0.42 | 0.44 | 0.09347 | 0.1404 | 1017/1004 | 190/468/359 | 204/471/329 |
| rs9621049 | Exon 7 | | 29343419 | G/A | 0.07 | 0.08 | 0.03017 | 0.6523 | 1018/1006 | 10/125/883 | 07/140/859 |
| rs4820889 | Exon 8 | | 29349044 | C/T | 0.04 | 0.04 | 0.4293 | – | 1019/1006 | 03/82/934 | 02/86/918 |
| rs10418 | 3′ UTR | | 29352952 | G/A | 0.21 | 0.22 | 0.2254 | 0.2349 | 1018/1006 | 53/329/636 | 56/334/616 |

MAF: Minor Allele Frequency, HWE:  Hardy-Weinberg equilibrium, N: number of subjects genotyped, Genotype count (11, 12, 22): 11 (homozygous major allele), 12 (heterozygous) and 22 (homozygous minor allele), NP: Non-polymorphic.

**Supplementary Table 2:** Allelic and genotypic distribution of SNPs in normal-weight and over-weight/obese subjects

| **Gene/SNP** | **Alleles**  **(Major/Minor)** | **Obese and overweight vs. Normal weight (562 OB &OW and 436 NW)** | | | | | | |
| --- | --- | --- | --- | --- | --- | --- | --- | --- |
| **MAF** | | **HWE** | | **N(OB & OW/NW)** | **Genotype count (11/12/22)** | |
| **OW/OB** | **NW** | **OW/OB** | **NW** | **OW/OB** | **NW** |
| ***ACE*** (Chr 17) | | | | | | | | |
| rs4291 | A/T | 0.37 | 0.37 | 0.06857 | 0.9174 | 556/430 | 65/279/212 | 57/202/171 |
| rs4298 | C/T | 0.04 | 0.04 | 0.6165 | – | 559/434 | 00/46/513 | 00/33/401 |
| rs4331 | C/T | 0.41 | 0.41 | 0.7932 | 0.8436 | 562/436 | 91/275/196 | 73/214/149 |
| rs13306091 | C/T | 0.00 | 0.00 | – | – | 562/434 | NP | NP |
| rs4362 | C/T | 0.37 | 0.36 | 0.6469 | 0.602 | 554/433 | 71/263/220 | 59/194/180 |
| rs4364 | A/C | 0.00 | 0.00 | – | – | 562/435 | NP | NP |
| ***AHCY*** (Chr 20) | | | | | | | | |
| rs819146 | A/C | 0.22 | 0.21 | 0.5369 | – | 559/433 | 29/186/344 | 18/142/273 |
| rs819147 | T/C | 0.22 | 0.20 | 0.5384 | 0.8825 | 562/435 | 29/187/346 | 17/143/275 |
| rs864702 | C/T | 0.22 | 0.21 | 0.5384 | – | 562/436 | 29/187/346 | 18/143/275 |
| rs819173 | T/C | 0.22 | 0.21 | 0.5384 | – | 562/436 | 29/187/346 | 18/143/275 |
| ***AMD1*** (Chr 6) | | | | | | | | |
| rs2796749 | C/G | 0.30 | 0.32 | – | 0.3826 | 562/436 | 52/238/272 | 50/183/203 |
| rs1007274 | G/A | 0.24 | 0.25 | 0.03757 | 0.6133 | 561/436 | 42/187/332 | 30/161/245 |
| rs7768897 | C/T | 0.24 | 0.26 | 0.7283 | 0.3241 | 562/436 | 33/201/328 | 34/161/241 |
| ***BHMT*** (Chr 5) | | | | | | | | |
| rs16876512 | C/T | 0.05 | 0.03 | 0.3879 | 0.3398 | 562/436 | 00/56/506 | 01/25/410 |
| rs492842 | T/C | 0.43 | 0.43 | 0.2617 | 0.8449 | 561/436 | 108/261/192 | 81/211/144 |
| rs3733890 | C/T | 0.29 | 0.26 | – | 0.8032 | 553/428 | 46/227/280 | 28/168/232 |
| rs585800 | A/T | 0.14 | 0.15 | 0.7214 | 0.2542 | 562/436 | 09/136/417 | 13/104/319 |
| ***CBS*** (Chr 21) | | | | | | | | |
| rs2014564 | G/A | 0.46 | 0.46 | – | 0.9231 | 562/436 | 120/280/162 | 91/215/130 |
| rs6586282 | G/A | 0.10 | 0.10 | 0.1033 | 0.4396 | 562/435 | 02/111/449 | 06/78/351 |
| rs706208 | T/C | 0.40 | 0.39 | 0.4288 | 0.421 | 561/436 | 94/260/207 | 69/199/168 |
| ***CHDH*** (Chr 3) | | | | | | | | |
| rs6445607 | T/G | 0.25 | 0.24 | 0.3144 | 0.3543 | 554/433 | 40/201/313 | 28/150/255 |
| rs12676 | G/T | 0.19 | 0.16 | 0.3377 | 0.2751 | 549/421 | 24/164/361 | 14/107/300 |
| rs2241808 | A/G | 0.40 | 0.42 | 0.93 | 0.3771 | 561/435 | 89/271/201 | 81/203/151 |
| rs4563403 | G/A | 0.09 | 0.13 | 0.6145 | – | 562/436 | 06/93/463 | 07/97/332 |
| ***CTH*** (Chr 1) | | | | | | | | |
| rs663465 | C/T | 0.46 | 0.45 | 0.4443 | 0.923 | 560/436 | 124/269/167 | 86/217/133 |
| rs672203 | T/C | 0.30 | 0.31 | 7.60×10-07 | 7.12×10-05 | 544/426 | 74/179/291 | 60/147/219 |
| rs663649 | C/A | 0.21 | 0.21 | 0.05878 | 0.8832 | 562/436 | 33/173/356 | 19/141/276 |
| rs1021737 | G/T | 0.24 | 0.25 | 0.566 | 0.004724 | 562/436 | 30/213/319 | 16/185/235 |
| rs6693082 | T/G | 0.25 | 0.25 | 0.5734 | 0.00655 | 556/430 | 32/214/310 | 16/183/231 |
| ***FOLH1*** (Chr 11) | | | | | | | | |
| rs202719 | T/C | 0.11 | 0.14 | 0.5009 | 0.4123 | 559/435 | 08/103/448 | 10/98/327 |
| ***MAT1A*** (Chr 10) | | | | | | | | |
| rs17677908 | T/C | 0.26 | 0.28 | 0.04935 | 0.2842 | 562/436 | 48/199/315 | 29/185/222 |
| rs2282367 | G/A | 0.15 | 0.15 | – | 0.8493 | 561/436 | 12/141/408 | 10/109/317 |
| rs10788546 | C/T | 0.16 | 0.16 | 0.8742 | 0.861 | 562/435 | 14/148/400 | 12/118/305 |
| rs2993763 | A/G | 0.36 | 0.35 | 0.4111 | 0.4623 | 562/436 | 77/250/235 | 50/207/179 |
| rs1985908 | T/C | 0.47 | 0.45 | 0.1282 | 0.7717 | 562/436 | 132/262/168 | 85/219/132 |
| ***MTHFD1*** (Chr 14) | | | | | | | | |
| rs1076991 | A/G | 0.44 | 0.43 | 0.8621 | 0.6889 | 546/415 | 104/272/170 | 74/208/133 |
| rs8006686 | T/C | 0.18 | 0.18 | 0.4823 | 0.7499 | 562/436 | 16/175/371 | 16/129/291 |
| rs1950902 | G/A | 0.07 | 0.06 | – | 0.667 | 562/435 | 02/71/489 | 02/49/384 |
| rs8016556 | A/G | 0.25 | 0.26 | 0.6569 | 0.01827 | 562/436 | 38/209/315 | 40/149/247 |
| rs2236225 | T/C | 0.47 | 0.5 | 0.5527 | 0.04385 | 558/435 | 122/286/150 | 118/196/121 |
| rs2281603 | T/C | 0.21 | 0.21 | 0.7986 | 0.008983 | 562/436 | 23/189/350 | 29/126/281 |
| ***MTHFD1L*** (Chr 6) | | | | | | | | |
| rs9397028 | G/A | 0.40 | 0.42 | 0.3753 | 0.7655 | 547/427 | 84/274/189 | 72/211/144 |
| rs2073063 | A/G | 0.42 | 0.44 | 0.4895 | 0.496 | 562/436 | 96/283/183 | 80/223/133 |
| rs1555179 | C/T | 0.24 | 0.21 | 0.4891 | 0.3041 | 561/435 | 29/211/321 | 22/135/278 |
| rs509474 | G/C | 0.34 | 0.31 | 0.4503 | 0.6522 | 562/436 | 59/259/244 | 43/181/212 |
| rs1047662 | C/G | 0.26 | 0.28 | 0.1031 | – | 562/436 | 47/203/312 | 35/178/223 |
| ***MTHFR*** (Chr 1) | | | | | | | | |
| rs3737965 | G/A | 0.11 | 0.09 | 0.001365 | 0.2321 | 561/435 | 00/119/442 | 01/74/360 |
| rs9651118 | T/C | 0.26 | 0.25 | – | 0.2035 | 562/436 | 37/217/308 | 33/154/249 |
| rs1801133 | C/T | 0.22 | 0.21 | 0.5332 | 0.5584 | 562/436 | 29/185/348 | 16/148/272 |
| rs1801131 | A/C | 0.39 | 0.40 | – | 0.5489 | 562/436 | 87/269/206 | 65/215/156 |
| ***MTR*** (Chr 1) | | | | | | | | |
| rs946403 | A/G | 0.38 | 0.42 | 0.7192 | – | 562/436 | 77/269/216 | 77/213/146 |
| rs1770449 | A/G | 0.29 | 0.27 | 0.5403 | 0.3968 | 562/435 | 51/226/285 | 28/179/228 |
| rs1805087 | T/C | 0.32 | 0.29 | – | 0.0262 | 562/436 | 57/243/262 | 26/197/213 |
| rs16834521 | T/C | 0.31 | 0.35 | 0.6914 | 0.4001 | 560/432 | 50/242/268 | 57/189/186 |
| rs10737812 | T/C | 0.39 | 0.37 | 0.3278 | 0.5399 | 562/436 | 90/255/217 | 57/210/169 |
| rs1050993 | C/T | 0.29 | 0.27 | 0.5403 | 0.5445 | 562/436 | 51/226/285 | 29/178/229 |
| ***MTRR*** (Chr 5) | | | | | | | | |
| rs1801394 | G/A | 0.48 | 0.47 | 0.6726 | 0.8472 | 562/435 | 132/275/155 | 96/214/125 |
| rs162036 | T/C | 0.14 | 0.15 | 0.1505 | 0.7121 | 562/436 | 06/142/414 | 11/111/314 |
| rs2287780 | C/T | 0.03 | 0.03 | – | – | 562/436 | 00/39/523 | 00/26/410 |
| rs16879334 | G/C | 0.03 | 0.03 | – | – | 562/436 | 00/39/523 | 00/26/410 |
| rs10380 | G/A | 0.13 | 0.15 | 0.0571 | 0.7032 | 562/436 | 04/136/422 | 10/107/319 |
| ***NOS3*** (Chr 7) | | | | | | | | |
| rs2070744 | A/G | 0.22 | 0.2 | 0.463 | 0.8816 | 561/436 | 30/187/344 | 18/139/279 |
| rs1549758 | C/T | 0.00 | 0.00 | – | – | 561/435 | NP | NP |
| rs1799983 | G/T | 0.18 | 0.17 | 0.08604 | 0.6062 | 557/432 | 12/178/367 | 14/118/300 |
| rs2566514 | G/C | 0.34 | 0.35 | 0.7075 | 0.8335 | 561/436 | 68/248/245 | 52/201/183 |
| ***SHMT1*** (Chr 17) | | | | | | | | |
| rs2273028 | C/T | 0.21 | 0.18 | 0.07159 | 0.4071 | 562/436 | 31/170/361 | 16/121/299 |
| rs1979277 | G/A | 0.19 | 0.16 | 0.1297 | 0.4837 | 561/434 | 26/161/374 | 14/115/305 |
| rs12949119 | A/T | 0.42 | 0.39 | 0.4759 | 0.4025 | 533/407 | 88/268/177 | 56/202/149 |
| ***SLC19A1*** (Chr 21) | | | | | | | | |
| rs1051266 | G/A | 0.39 | 0.39 | 0.1535 | 0.1301 | 556/430 | 92/248/216 | 58/220/152 |
| rs12659 | G/A | 0.35 | 0.34 | 0.06294 | 0.0526 | 559/431 | 79/234/246 | 40/212/179 |
| rs35786590 | C/T | 0.00 | 0.00 | – | – | 556/427 | NP | NP |
| rs1051296 | A/C | 0.46 | 0.46 | 0.1266 | 0.6299 | 562/436 | 127/261/174 | 90/223/123 |
| ***TCN2*** (Chr 22) | | | | | | | | |
| rs5749131 | A/G | 0.42 | 0.38 | – | 0.6129 | 562/436 | 101/275/186 | 67/201/168 |
| rs9606756 | T/C | 0.10 | 0.09 | 0.4649 | 0.3712 | 562/436 | 07/95/460 | 05/68/363 |
| rs1801198 | G/C | 0.46 | 0.41 | 0.1751 | 0.4882 | 561/435 | 128/263/170 | 75/203/157 |
| rs9621049 | G/A | 0.08 | 0.07 | 0.7694 | 0.482 | 562/436 | 04/81/477 | 03/57/376 |
| rs4820889 | C/T | 0.04 | 0.05 | – | – | 562/436 | 01/45/516 | 01/41/394 |
| rs10418 | G/A | 0.24 | 0.20 | 0.8164 | 0.1763 | 562/436 | 33/202/327 | 22/130/284 |

**Supplementary Table 3:** Association of SNPs with type 2 diabetes

| **Gene/SNP** | **Minor allele** | **MAF patients**  **(N=1019)** | **MAF controls**  **(N=1006)** | **Type 2 diabetes**  **(total study population: 1019 cases and 1006 controls)** | | **Type 2 diabetes**  **(Normal weight subjects:290 cases vs. 436 controls)** | | **Type 2 diabetes (Obese/over-weight subjects: 691cases vs. 562 controls)** | |
| --- | --- | --- | --- | --- | --- | --- | --- | --- | --- |
| **OR [95% CI]** | ***P*** | **OR [95% CI]** | ***P*** | **OR [95% CI]** | ***P*** |
| ***ACE* (Chr 17)** | | | | | | | | | |
| rs4291 | T | 0.39 | 0.37 | 1.08 [0.94 - 1.23] | 0.281 | 1.01 [0.80 - 1.28] | 0.942 | 1.12 [0.95 - 1.31] | 0.187 |
| rs4331 | T | 0.41 | 0.41 | 1.00 [0.88 - 1.14] | 0.950 | 0.92 [0.73 - 1.15] | 0.464 | 1.03 [0.88 - 1.21] | 0.702 |
| rs4362 | T | 0.37 | 0.36 | 1.04 [0.91 - 1.19] | 0.531 | 1.00 [0.79 - 1.26] | 0.993 | 1.04 [0.88 - 1.23] | 0.612 |
| ***AHCY* (Chr 20)** | | | | | | | | | |
| rs819146 | C | 0.22 | 0.21 | 1.03 [0.88 - 1.19] | 0.749 | 1.02 [0.78 - 1.34] | 0.871 | 1.01 [0.84 - 1.22] | 0.910 |
| rs819147 | C | 0.22 | 0.21 | 1.03 [0.89 - 1.20] | 0.681 | 1.04 [0.79 - 1.37] | 0.774 | 1.02 [0.84 - 1.23] | 0.855 |
| rs864702 | T | 0.22 | 0.21 | 1.03 [0.88 - 1.20] | 0.730 | 1.01 [0.77 - 1.32] | 0.949 | 1.02 [0.84 - 1.23] | 0.855 |
| rs819173 | C | 0.22 | 0.21 | 1.03 [0.88 - 1.19] | 0.748 | 1.02 [0.78 - 1.34] | 0.891 | 1.02 [0.84 - 1.23] | 0.874 |
| ***AMD1* (Chr 6)** | | | | | | | | | |
| rs2796749 | G | 0.33 | 0.31 | 1.09 [0.95 - 1.25] | 0.213 | 0.93 [0.73 - 1.18] | 0.545 | 1.18 [1.00 - 1.40] | 0.054 |
| rs1007274 | A | 0.26 | 0.25 | 1.07 [0.93 - 1.24] | 0.340 | 0.99 [0.76 - 1.28] | 0.928 | 1.12 [0.94 - 1.33] | 0.217 |
| rs7768897 | T | 0.25 | 0.25 | 1.04 [0.90 - 1.20] | 0.583 | 0.89 [0.69 - 1.15] | 0.386 | 1.12 [0.93 - 1.35] | 0.217 |
| ***BHMT* (Chr 5)** | | | | | | | | | |
| rs492842 | C | 0.44 | 0.43 | 1.03 [0.91 - 1.17] | 0.642 | 1.13 [0.90 - 1.41] | 0.293 | 1.00 [0.86 - 1.18] | 0.959 |
| rs3733890 | T | 0.29 | 0.28 | 1.02 [0.89 - 1.18] | 0.742 | 1.10 [0.85 - 1.44] | 0.466 | 1.01 [0.85 - 1.21] | 0.879 |
| rs585800 | T | 0.15 | 0.14 | 1.03 [0.86 - 1.22] | 0.786 | 0.92 [0.68 - 1.26] | 0.616 | 1.04 [0.83 - 1.30] | 0.746 |
| ***CBS* (Chr 21)** | | | | | | | | | |
| rs706208 | C | 0.41 | 0.39 | 1.08 [0.95 - 1.23] | 0.226 | 1.30 [1.03 - 1.63] | 0.025 | 1.01 [0.86 - 1.18] | 0.945 |
| rs6586282 | A | 0.10 | 0.10 | 0.93 [0.75 - 1.15] | 0.488 | 0.81 [0.55 - 1.19] | 0.276 | 0.96 [0.73 - 1.26] | 0.764 |
| rs2014564 | A | 0.44 | 0.46 | 0.92 [0.81 - 1.05] | 0.231 | 0.93 [0.74 - 1.18] | 0.559 | 0.90 [0.77 - 1.06] | 0.205 |
| ***CHDH* (Chr 3)** | | | | | | | | | |
| rs4563403 | A | 0.10 | 0.11 | 0.93 [0.75 - 1.14] | 0.461 | 0.66 [0.45 - 0.95] | 0.024 | 1.10 [0.85 - 1.44] | 0.469 |
| rs2241808 | G | 0.40 | 0.41 | 0.94 [0.82 - 1.07] | 0.330 | 0.88 [0.70 - 1.10] | 0.252 | 0.99 [0.84 - 1.17] | 0.888 |
| rs12676 | T | 0.18 | 0.18 | 0.97 [0.82 - 1.14] | 0.686 | 1.08 [0.80 - 1.46] | 0.611 | 0.92 [0.75 - 1.13] | 0.436 |
| rs6445607 | G | 0.25 | 0.25 | 0.99 [0.86 - 1.15] | 0.929 | 1.10 [0.85 - 1.43] | 0.459 | 0.96 [0.80 - 1.15] | 0.633 |
| ***CTH* (Chr 1)** | | | | | | | | | |
| rs663465 | T | 0.46 | 0.46 | 1.01 [0.89 - 1.15] | 0.837 | 0.95 [0.76 - 1.19] | 0.657 | 1.01 [0.86 - 1.17] | 0.954 |
| rs663649 | A | 0.20 | 0.21 | 0.98 [0.84 - 1.14] | 0.756 | 0.95 [0.72 - 1.26] | 0.741 | 0.98 [0.81 - 1.19] | 0.850 |
| rs1021737 | T | 0.26 | 0.25 | 1.06 [0.91 - 1.23] | 0.487 | 0.99 [0.75 - 1.31] | 0.956 | 1.11 [0.92 - 1.33] | 0.289 |
| rs6693082 | G | 0.26 | 0.25 | 1.05 [0.91 - 1.23] | 0.489 | 1.02 [0.77 - 1.34] | 0.910 | 1.09 [0.91 - 1.31] | 0.352 |
| ***FOLH1* (Chr 11)** | | | | | | | | | |
| rs202719 | C | 0.13 | 0.12 | 1.09 [0.90 - 1.32] | 0.366 | 0.99 [0.72 - 1.37] | 0.941 | 1.16 [0.91 - 1.48] | 0.231 |
| ***MAT1A* (Chr 10)** | | | | | | | | | |
| rs1985908 | C | 0.45 | 0.46 | 0.96 [0.85 - 1.08] | 0.494 | 1.02 [0.82 - 1.28] | 0.863 | 0.92 [0.79 - 1.08] | 0.301 |
| rs2993763 | G | 0.34 | 0.36 | 0.95 [0.83 - 1.08] | 0.412 | 0.98 [0.77 - 1.25] | 0.869 | 0.94 [0.80 - 1.11] | 0.466 |
| rs10788546 | T | 0.17 | 0.16 | 1.05 [0.88 - 1.24] | 0.604 | 1.13 [0.83 - 1.53] | 0.434 | 1.08 [0.87 - 1.34] | 0.503 |
| rs17677908 | C | 0.27 | 0.27 | 1.01 [0.87 - 1.16] | 0.933 | 0.82 [0.63 - 1.07] | 0.153 | 1.05 [0.89 - 1.25] | 0.556 |
| rs2282367 | A | 0.16 | 0.15 | 1.09 [0.91 - 1.30] | 0.336 | 1.26 [0.93 - 1.71] | 0.138 | 1.07 [0.86 - 1.34] | 0.537 |
| ***MTHFD1* (Chr 14)** | | | | | | | | | |
| rs1076991 | G | 0.40 | 0.44 | 0.89 [0.78 - 1.01] | 0.067 | 1.09 [0.86 - 1.38] | 0.466 | 0.81 [0.69 - 0.95] | 0.012 |
| rs8006686 | C | 0.17 | 0.19 | 0.89 [0.76 - 1.06] | 0.184 | 1.08 [0.81 - 1.44] | 0.585 | 0.83 [0.67 - 1.02] | 0.073 |
| rs1950902 | A | 0.07 | 0.06 | 1.02 [0.79 - 1.33] | 0.856 | 0.91 [0.57 - 1.46] | 0.700 | 1.04 [0.75 - 1.43] | 0.823 |
| rs8016556 | G | 0.26 | 0.26 | 1.02 [0.89 - 1.18] | 0.758 | 0.89 [0.69 - 1.14] | 0.344 | 1.09 [0.91 - 1.30] | 0.361 |
| rs2236225 | C | 0.48 | 0.49 | 1.02 [0.90 - 1.15] | 0.819 | 0.88 [0.71 - 1.10] | 0.251 | 1.07 [0.92 - 1.26] | 0.378 |
| rs2281603 | C | 0.21 | 0.21 | 1.03 [0.89 - 1.20] | 0.679 | 0.95 [0.73 - 1.24] | 0.706 | 1.08 [0.89 - 1.31] | 0.465 |
| ***MTHFD1L* (Chr 6)** | | | | | | | | | |
| rs9397028 | A | 0.41 | 0.41 | 1.01 [0.88 - 1.15] | 0.917 | 0.94 [0.74 - 1.19] | 0.607 | 1.04 [0.88 - 1.24] | 0.622 |
| rs2073063 | G | 0.43 | 0.43 | 1.00 [0.87 - 1.13] | 0.943 | 0.98 [0.78 - 1.23] | 0.844 | 1.02 [0.87 - 1.20] | 0.801 |
| rs1555179 | T | 0.26 | 0.23 | 1.15 [0.99 - 1.34] | 0.060 | 1.36 [1.04 - 1.78] | 0.026 | 1.09 [0.90 - 1.31] | 0.375 |
| rs509474 | C | 0.32 | 0.32 | 0.99 [0.86 - 1.13] | 0.854 | 0.98 [0.77 - 1.26] | 0.899 | 0.94 [0.80 - 1.12] | 0.494 |
| rs1047662 | G | 0.27 | 0.27 | 0.95 [0.83 - 1.10] | 0.516 | 0.88 [0.69 - 1.14] | 0.336 | 0.99 [0.83 - 1.18] | 0.885 |
| ***MTHFR* (Chr 1)** | | | | | | | | | |
| rs1801131 | C | 0.42 | 0.40 | 1.13 [0.99 - 1.28] | 0.072 | 1.18 [0.93 - 1.49] | 0.173 | 1.09 [0.93 - 1.28] | 0.269 |
| rs1801133 | T | 0.18 | 0.21 | 0.78 [0.67 - 0.92] | 0.003 | 0.62 [0.46 - 0.85] | 0.002 | 0.86 [0.71 - 1.05] | 0.130 |
| rs9651118 | C | 0.26 | 0.26 | 1.02 [0.89 - 1.18] | 0.747 | 1.31 [1.01 - 1.68] | 0.040 | 0.94 [0.78 - 1.13] | 0.485 |
| ***MTR* (Chr 1)** | | | | | | | | | |
| rs1770449 | G | 0.28 | 0.28 | 0.99 [0.86 - 1.14] | 0.852 | 1.16 [0.90 - 1.50] | 0.265 | 0.95 [0.80 - 1.13] | 0.555 |
| rs1805087 | C | 0.31 | 0.30 | 0.98 [0.85 - 1.12] | 0.763 | 0.97 [0.75 - 1.24] | 0.782 | 0.96 [0.81 - 1.14] | 0.650 |
| rs16834521 | C | 0.34 | 0.33 | 1.10 [0.96 - 1.26] | 0.177 | 0.95 [0.75 - 1.19] | 0.640 | 1.15 [0.96 - 1.36] | 0.125 |
| rs10737812 | C | 0.37 | 0.38 | 0.96 [0.84 - 1.09] | 0.490 | 1.13 [0.90 - 1.43] | 0.288 | 0.93 [0.79 - 1.09] | 0.374 |
| rs1050993 | T | 0.28 | 0.28 | 0.98 [0.85 - 1.14] | 0.829 | 1.16 [0.89 - 1.49] | 0.272 | 0.95 [0.80 - 1.13] | 0.561 |
| rs946403 | G | 0.40 | 0.40 | 1.05 [0.92 - 1.20] | 0.452 | 0.95 [0.76 - 1.20] | 0.693 | 1.09 [0.92 - 1.29] | 0.303 |
| ***MTRR* (Chr 5)** | | | | | | | | | |
| rs1801394 | A | 0.50 | 0.47 | 1.06 [0.94 - 1.20] | 0.344 | 1.03 [0.82 - 1.29] | 0.809 | 1.12 [0.96 - 1.31] | 0.159 |
| rs162036 | C | 0.15 | 0.14 | 1.02 [0.85 - 1.22] | 0.829 | 0.77 [0.56 - 1.06] | 0.109 | 1.19 [0.95 - 1.49] | 0.138 |
| rs10380 | A | 0.14 | 0.14 | 1.05 [0.87 - 1.26] | 0.600 | 0.74 [0.53 - 1.03] | 0.078 | 1.26 [1.00 - 1.59] | 0.050 |
| ***NOS3* (Chr 7)** | | | | | | | | | |
| rs2070744 | G | 0.20 | 0.21 | 0.92 [0.79 - 1.07] | 0.277 | 1.10 [0.84 - 1.45] | 0.480 | 0.83 [0.69 - 1.01] | 0.064 |
| rs1799983 | T | 0.18 | 0.18 | 1.00 [0.85 - 1.19] | 0.974 | 0.97 [0.72 - 1.31] | 0.849 | 0.99 [0.80 - 1.22] | 0.934 |
| rs2566514 | C | 0.33 | 0.35 | 0.95 [0.83 - 1.08] | 0.436 | 1.09 [0.86 - 1.38] | 0.469 | 0.90 [0.77 - 1.07] | 0.237 |
| ***SHMT1* (Chr 17)** | | | | | | | | | |
| rs12949119 | T | 0.40 | 0.40 | 0.94 [0.82 - 1.08] | 0.405 | 0.83 [0.65 - 1.07] | 0.154 | 0.96 [0.81 - 1.14] | 0.668 |
| rs1979277 | A | 0.17 | 0.18 | 0.89 [0.75 - 1.05] | 0.163 | 0.88 [0.65 - 1.19] | 0.404 | 0.88 [0.72 - 1.08] | 0.217 |
| rs2273028 | T | 0.18 | 0.19 | 0.89 [0.76 - 1.04] | 0.149 | 0.95 [0.71 - 1.27] | 0.721 | 0.85 [0.70 - 1.04] | 0.116 |
| ***SLC19A1* (Chr 21)** | | | | | | | | | |
| rs1051296 | C | 0.45 | 0.46 | 0.96 [0.84 - 1.08] | 0.478 | 0.97 [0.78 - 1.22] | 0.806 | 0.95 [0.81 - 1.11] | 0.541 |
| rs12659 | A | 0.33 | 0.35 | 0.89 [0.78 - 1.02] | 0.086 | 0.92 [0.72 - 1.19] | 0.521 | 0.89 [0.75 - 1.05] | 0.157 |
| rs1051266 | A | 0.37 | 0.39 | 0.91 [0.80 - 1.04] | 0.170 | 0.83 [0.65 - 1.07] | 0.152 | 0.96 [0.82 - 1.13] | 0.650 |
| ***TCN2* (Chr 22)** | | | | | | | | | |
| rs5749131 | G | 0.39 | 0.41 | 0.91 [0.80 - 1.04] | 0.158 | 0.89 [0.71 - 1.12] | 0.323 | 0.89 [0.76 - 1.04] | 0.146 |
| rs9606756 | C | 0.09 | 0.09 | 0.89 [0.71 - 1.10] | 0.267 | 0.95 [0.65 - 1.39] | 0.779 | 0.86 [0.65 - 1.12] | 0.265 |
| rs1801198 | C | 0.42 | 0.44 | 0.90 [0.79 - 1.02] | 0.093 | 1.00 [0.80 - 1.24] | 0.967 | 0.85 [0.72 - 0.99] | 0.035 |
| rs9621049 | A | 0.07 | 0.08 | 0.90 [0.71 - 1.15] | 0.404 | 0.94 [0.62 - 1.43] | 0.784 | 0.90 [0.67 - 1.21] | 0.490 |
| rs10418 | A | 0.21 | 0.22 | 0.95 [0.81 - 1.10] | 0.468 | 1.08 [0.82 - 1.43] | 0.576 | 0.87 [0.72 - 1.04] | 0.127 |

**Supplementary Table 4:** Association of SNPs with obesity

| **SNP** | **Minor allele** | **MAF: OB&OW** | **MAF: NW** | **OR [95% CI]** | ***P*** |
| --- | --- | --- | --- | --- | --- |
| *ACE* (Chr 17) | | | | | |
| rs4291 | T | 0.37 | 0.37 | 0.99 [0.82 - 1.20] | 0.931 |
| rs4331 | T | 0.41 | 0.41 | 0.97 [0.81 - 1.16] | 0.710 |
| rs4362 | T | 0.37 | 0.36 | 1.01 [0.84 - 1.22] | 0.908 |
| *AHCY* (Chr 20) | | | | | |
| rs819173 | C | 0.22 | 0.21 | 1.08 [0.87 - 1.34] | 0.511 |
| rs864702 | T | 0.22 | 0.21 | 1.08 [0.87 - 1.34] | 0.511 |
| rs819147 | C | 0.22 | 0.2 | 1.09 [0.87 - 1.35] | 0.454 |
| rs819146 | C | 0.22 | 0.21 | 1.08 [0.87 - 1.34] | 0.506 |
| *AMD1* (Chr 6) | | | | | |
| rs2796749 | G | 0.30 | 0.32 | 0.91 [0.75 - 1.10] | 0.319 |
| rs1007274 | A | 0.24 | 0.25 | 0.94 [0.77 - 1.15] | 0.535 |
| rs7768897 | T | 0.24 | 0.26 | 0.88 [0.72 - 1.08] | 0.207 |
| *BHMT* (Chr 5) | | | | | |
| rs492842 | C | 0.43 | 0.43 | 1.00 [0.84 - 1.20] | 0.981 |
| rs3733890 | T | 0.29 | 0.26 | 1.16 [0.94 - 1.42] | 0.161 |
| rs585800 | T | 0.14 | 0.15 | 0.90 [0.70 - 1.16] | 0.433 |
| *CBS* (Chr 21) | | | | | |
| rs706208 | C | 0.40 | 0.39 | 1.07 [0.89 - 1.27] | 0.491 |
| rs6586282 | A | 0.10 | 0.10 | 1.01 [0.75 - 1.36] | 0.966 |
| rs2014564 | A | 0.46 | 0.46 | 1.01 [0.85 - 1.21] | 0.901 |
| *CHDH* (Chr 3) | | | | | |
| rs4563403 | A | 0.09 | 0.13 | 0.69 [0.52 - 0.92] | 0.01 |
| rs2241808 | G | 0.4 | 0.42 | 0.92 [0.77 - 1.10] | 0.344 |
| rs12676 | T | 0.19 | 0.16 | 1.26 [1.00 - 1.59] | 0.05 |
| rs6445607 | G | 0.25 | 0.24 | 1.10 [0.90 – 1.35] | 0.345 |
| *CTH* (Chr 1) | | | | | |
| rs663465 | T | 0.46 | 0.45 | 1.08 [0.91 - 1.30] | 0.372 |
| rs663649 | A | 0.21 | 0.21 | 1.05 [0.85 - 1.30] | 0.676 |
| rs1021737 | T | 0.24 | 0.25 | 0.98 [0.79 - 1.21] | 0.832 |
| rs6693082 | G | 0.25 | 0.25 | 1.01 [0.81 - 1.25] | 0.945 |
| *FOLH1* (Chr 11) | | | | | |
| rs202719 | C | 0.11 | 0.14 | 0.76 [0.58 – 1.00] | 0.05 |
| *MAT1A* (Chr 10) | | | | | |
| rs1985908 | C | 0.47 | 0.45 | 1.10 [0.92 - 1.31] | 0.285 |
| rs2993763 | G | 0.36 | 0.35 | 1.05 [0.87 - 1.27] | 0.593 |
| rs10788546 | T | 0.16 | 0.16 | 0.97 [0.76 - 1.23] | 0.775 |
| rs17677908 | C | 0.26 | 0.28 | 0.91 [0.75 - 1.11] | 0.353 |
| rs2282367 | A | 0.15 | 0.15 | 1.01 [0.78 - 1.30] | 0.948 |
| *MTHFD1* (Chr 14) | | | | | |
| rs1076991 | G | 0.44 | 0.43 | 1.03 [0.86 - 1.24] | 0.747 |
| rs8006686 | C | 0.18 | 0.18 | 0.99 [0.79 - 1.25] | 0.935 |
| rs1950902 | A | 0.07 | 0.06 | 1.12 [0.78 - 1.62] | 0.536 |
| rs8016556 | G | 0.25 | 0.26 | 0.98 [0.80 - 1.19] | 0.817 |
| rs2236225 | C | 0.47 | 0.50 | 0.93 [0.78 - 1.11] | 0.425 |
| rs2281603 | C | 0.21 | 0.21 | 1.02 [0.82 - 1.26] | 0.889 |
| *MTHFD1L* (Chr 6) | | | | | |
| rs9397028 | A | 0.40 | 0.42 | 0.96 [0.80 - 1.16] | 0.703 |
| rs2073063 | G | 0.42 | 0.44 | 0.94 [0.78 - 1.13] | 0.482 |
| rs1555179 | T | 0.24 | 0.21 | 1.21 [0.98 - 1.50] | 0.08 |
| rs509474 | C | 0.34 | 0.31 | 1.15 [0.95 - 1.39] | 0.163 |
| rs1047662 | G | 0.26 | 0.28 | 0.91 [0.75 - 1.11] | 0.350 |
| *MTHFR* (Chr 1) | | | | | |
| rs1801131 | C | 0.39 | 0.40 | 0.97 [0.81 - 1.17] | 0.749 |
| rs1801133 | T | 0.22 | 0.21 | 1.07 [0.86 - 1.33] | 0.557 |
| rs9651118 | C | 0.26 | 0.25 | 1.05 [0.86 - 1.29] | 0.625 |
| *MTR* (Chr 1) | | | | | |
| rs1770449 | G | 0.29 | 0.27 | 1.10 [0.90 - 1.34] | 0.368 |
| rs1805087 | C | 0.32 | 0.29 | 1.18 [0.97 - 1.44] | 0.104 |
| rs16834521 | C | 0.31 | 0.35 | 0.82 [0.68 - 0.99] | 0.04 |
| rs10737812 | C | 0.39 | 0.37 | 1.06 [0.88 - 1.27] | 0.548 |
| rs1050993 | T | 0.29 | 0.27 | 1.09 [0.89 - 1.33] | 0.388 |
| rs946403 | G | 0.38 | 0.42 | 0.84 [0.70 - 1.01] | 0.06 |
| *MTRR* (Chr 5) | | | | | |
| rs1801394 | A | 0.48 | 0.47 | 1.05 [0.88 - 1.25] | 0.586 |
| rs162036 | C | 0.14 | 0.15 | 0.86 [0.66 - 1.11] | 0.248 |
| rs10380 | A | 0.13 | 0.15 | 0.84 [0.64 - 1.09] | 0.194 |
| *NOS3* (Chr 7) | | | | | |
| rs2070744 | G | 0.22 | 0.20 | 1.13 [0.91 - 1.40] | 0.282 |
| rs1799983 | T | 0.18 | 0.17 | 1.10 [0.87 - 1.40] | 0.435 |
| rs2566514 | C | 0.34 | 0.35 | 0.98 [0.81 - 1.18] | 0.814 |
| *SHMT1* (Chr 17) | | | | | |
| rs12949119 | T | 0.42 | 0.39 | 1.13 [0.94 - 1.37] | 0.200 |
| rs1979277 | A | 0.19 | 0.16 | 1.17 [0.93 - 1.47] | 0.189 |
| rs2273028 | T | 0.21 | 0.18 | 1.20 [0.96 - 1.49] | 0.115 |
| *SLC19A1* (Chr 21) | | | | | |
| rs1051296 | C | 0.46 | 0.46 | 1.00 [0.84 - 1.19] | 0.992 |
| rs12659 | A | 0.35 | 0.34 | 1.05 [0.87 - 1.27] | 0.583 |
| rs1051266 | A | 0.39 | 0.39 | 1.00 [0.83 - 1.20] | 0.961 |
| *TCN2* (Chr 22) | | | | | |
| rs5749131 | G | 0.42 | 0.38 | 1.17 [0.97 - 1.40] | 0.096 |
| rs9606756 | C | 0.10 | 0.09 | 1.11 [0.82 - 1.50] | 0.513 |
| rs1801198 | C | 0.46 | 0.41 | 1.24 [1.04 - 1.48] | 0.02 |
| rs9621049 | A | 0.08 | 0.07 | 1.15 [0.82 - 1.60] | 0.422 |
| rs10418 | A | 0.24 | 0.20 | 1.22 [0.98 - 1.51] | 0.07 |

All analysis was performed only in control subjects and adjusted for sex and age

**Supplementary Table 5:** Variants showing association with quantitative traits in first phase

| **Trait** | **SNP** | **Gene** | **β [95% CI]** | ***P*** |
| --- | --- | --- | --- | --- |
| **BMI** ‡ | rs16834521 | *MTR* | -0.56 [-1.01 - -0.11] | 0.01 |
| rs12949119 | *SHMT1* | 0.56 [0.10 - 1.02] | 0.02 |
| rs1801198 | *TCN2* | 0.48 [0.07 - 0.90] | 0.02 |
| **TC**† | rs1007274 | *AMD1* | -4.98 [-8.97 - -1.00] | 0.01 |
| rs6586282 | *CBS* | 9.03 [3.11 - 14.94] | 0.003 |
| rs2014564 | *CBS* | -4.23 [-7.79 - -0.67] | 0.02 |
| rs1076991 | *MTHFD1* | -4.05 [-7.74 - -0.35] | 0.03 |
| rs1801133 | *MTHFR* | 5.61 [1.28 - 9.94] | 0.01 |
| rs1801131 | *MTHFR* | -4.34 [-7.98 - -0.69] | 0.02 |
| rs1805087 | *MTR* | 5.11 [1.18 - 9.05] | 0.01 |
| rs10737812 | *MTR* | -4.33 [-7.96 - -0.70] | 0.02 |
| **C-peptide**† | rs17677908 | *MAT1A* | 0.11 [0.01 - 0.21] | 0.04 |
| rs2070744 | *NOS3* | 0.15 [0.04 - 0.26] | 0.007 |
| **Creatinine**† | rs10788546 | *MAT1A* | -0.03 [-0.06 - -0.01] | 0.006 |
| rs2993763 | *MAT1A* | -0.02 [-0.04 - 0.00] | 0.02 |
| rs2282367 | *MAT1A* | -0.03 [-0.05 - 0.00] | 0.04 |
| rs1555179 | *MTHFD1L* | 0.02 [0.00 - 0.04] | 0.04 |
| **CRP**† | rs7768897 | *AMD1* | -0.28 [-0.48 - -0.07] | 0.008 |
| rs1007274 | *AMD1* | 0.26 [0.06 - 0.47] | 0.01 |
| rs2796749 | *AMD1* | -0.25 [-0.44 - -0.05] | 0.01 |
| **FPG**† | rs1076991 | *MTHFD1* | -1.35 [-2.38 - -0.32] | 0.01 |
| rs1051266 | *SLC19A1* | -1.24 [-2.26 - -0.21] | 0.02 |
| rs12659 | *SLC19A1* | -1.15 [-2.20 - -0.1] | 0.03 |
| rs1051296 | *SLC19A1* | -1.05 [-2.04 - -0.06] | 0.04 |
| **HbA1c**† | rs1805087 | *MTR* | 0.05 [0.00 - 0.09] | 0.04 |
| **HDL**† | rs1801133 | *MTHFR* | 2.14 [0.68 - 3.59] | 0.004 |
| **HOMA-IR**† | rs2070744 | *NOS3* | 0.28 [0.09 - 0.48] | 0.005 |
| rs2566514 | *NOS3* | 0.21 [0.04 - 0.38] | 0.02 |
| **FPI**† | rs2070744 | *NOS3* | 1.24 [0.38 - 2.10] | 0.005 |
| rs2566514 | *NOS3* | 0.91 [0.16 - 1.66] | 0.02 |
| **LDL**† | rs1007274 | *AMD1* | -6.35 [-9.61 - -3.10] | 0.00014 |
| rs3733890 | *BHMT* | 3.57 [0.29 - 6.85] | 0.03 |
| rs6586282 | *CBS* | 6.18 [1.31 - 11.04] | 0.01 |
| **2h PPG**† | rs9651118 | *MTHFR* | 5.75 [1.03 - 10.48] | 0.018 |
| rs1801133 | *MTHFR* | -5.06 [-9.72 - -0.40] | 0.04 |
| **Urea**† | rs4563403 | *CHDH* | 1.25 [0.08 - 2.43] | 0.04 |
| rs162036 | *MTRR* | 1.50 [0.43 - 2.58] | 0.006 |
| rs10380 | *MTRR* | 1.40 [0.29 - 2.50] | 0.01 |
| rs5749131 | *TCN2* | 0.79 [0.03 - 1.54] | 0.04 |
| **Uric acid**† | rs6445607 | *CHDH* | -0.39 [-0.76 - -0.03] | 0.04 |
| rs17677908 | *MAT1A* | 0.48 [0.13 - 0.83] | 0.008 |
| rs8016556 | *MTHFD1* | 0.50 [0.15 - 0.85] | 0.006 |
| rs2281603 | *MTHFD1* | 0.42 [0.04 - 0.80] | 0.03 |
| rs1051266 | *SLC19A1* | -0.41 [-0.74 - -0.08] | 0.02 |
| rs12659 | *SLC19A1* | -0.37 [-0.70 - -0.03] | 0.03 |
| **WHR** ‡ | rs12949119 | *SHMT1* | 0.01 [0.001 - 0.01] | 0.02 |
| rs1051296 | *SLC19A1* | -0.01 [-0.01 - -0.0009] | 0.02 |

All analysis was performed only in control subjects

†Analyses adjusted for sex, age and BMI

‡Analysis adjusted for sex and age

**Supplementary Figure 1**: Multidimensional scaling plot

608 unlinked markers (r2<0.20) were used to obtain positions on first and second dimensions using PLINK in first phase samples.
